# Supplementary material for: A Stimuli-Responsive Biosensor of Glucose on Layer-by-Layer Films Assembled through Specific Lectin-Glycoenzyme Recognition
Source: Sensors (Basel). 2016 Apr 20;16(4):563. doi: 10.3390/s16040563 (PMC4851077; doi:10.3390/s16040563)
Supplement: Supplementary file 1 [file sensors-16-00563-s001.pdf]

# Supplementary Materials: Stimuli-Responsive Biosensor of Glucose on Layer-by-Layer Films Assembled through Specific Lectin-Glycoenzyme Recognition

Huiqin Yao, Qianqian Gan, Juan Peng, Shan Huang, Meilin Zhu and Keren Shi

**Table S1.** The surface concentration of GOD ( $\Gamma^*$ , mol·cm<sup>-2</sup>) for {Con A/GOD}<sub>n</sub> with different number of bilayers (*n*).

| {Con A/GOD} <sub>n</sub> | Q (C) × 10 <sup>7</sup> | $\Gamma^*$ , (mol·cm <sup>-2</sup> ) × 10 <sup>11</sup> |
|--------------------------|-------------------------|---------------------------------------------------------|
| <i>n</i> = 1             | 1.559                   | 1.010                                                   |
| <i>n</i> = 3             | 3.685                   | 2.387                                                   |
| <i>n</i> = 5             | 5.555                   | 3.598                                                   |
| <i>n</i> = 7             | 6.468                   | 4.190                                                   |

According to the equation of  $Q = nAF\Gamma^*$  based on the Faraday's law, where *n* is the number of electrons transferred (1), *A* is the geometric area of PG electrode (0.16 cm<sup>2</sup>) and *F* is the Faraday constant (96487 C·mol<sup>-1</sup>).

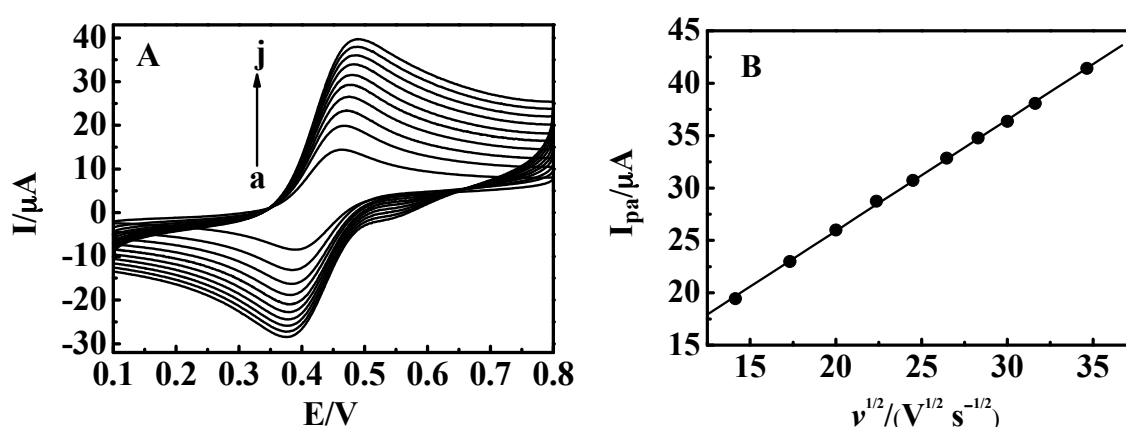

**Figure S1.** (A) CVs of 0.5 mM Fc(COOH)<sub>2</sub> in pH 4.0 buffers for {Con A/GOD}<sub>5</sub> films at different scan rates (V·s<sup>-1</sup>): (a) 0.01, (b) 0.02, (c) 0.03, (d) 0.04, (e) 0.05, (f) 0.06, (g) 0.07, (h) 0.08, (i) 0.09 and (j) 1.0; (B) Effect of scan rate (*v*) on the *I*<sub>pa</sub> of Fc(COOH)<sub>2</sub> for {Con A/GOD}<sub>5</sub> films.

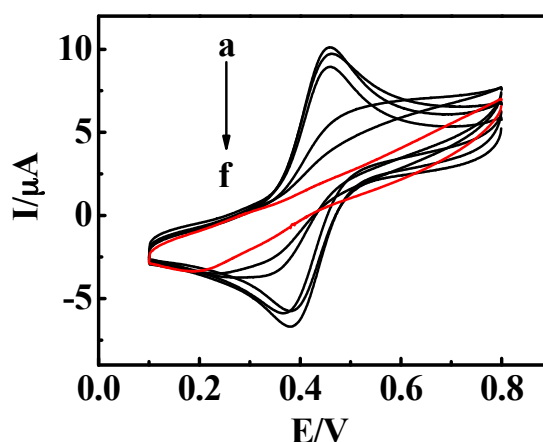

**Figure S2.** CVs of 0.5 mM Fc(COOH)<sub>2</sub> for {Con A/GOD}<sub>5</sub> films at 0.1 V·s<sup>-1</sup> in buffers at pH (a) 4.0, (b) 4.5, (c) 5.0, (d) 6.0, (e) 7.0, and (f) 8.0.

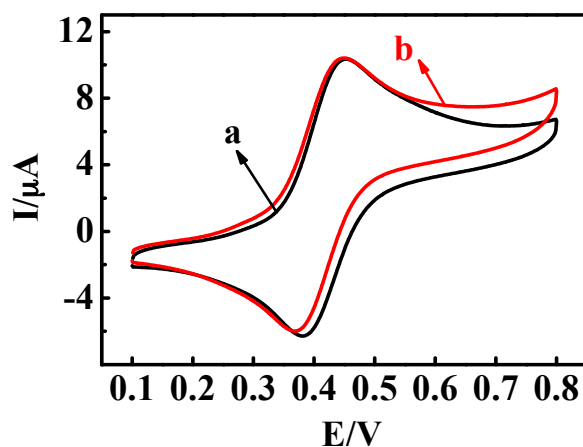

**Figure S3.** CVs of 0.5 mM  $\text{Fc}(\text{COOH})_2$  at  $0.1 \text{ V}\cdot\text{s}^{-1}$  for bare PG electrode in buffers at pH (a) 4.0 and (b) 8.0.

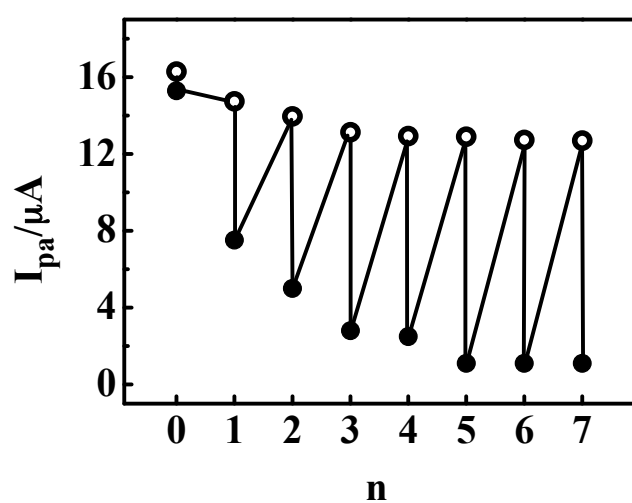

**Figure S4.** Influence of the number of bilayers ( $n$ ) for  $\{\text{Con A/GOD}\}_n$  films on CV reduction peak current ( $I_{\text{pa}}$ ) of 0.5 mM  $\text{Fc}(\text{COOH})_2$  in buffers at pH 4.0 (○) and 8.0 (●) at  $0.1 \text{ V}\cdot\text{s}^{-1}$ .

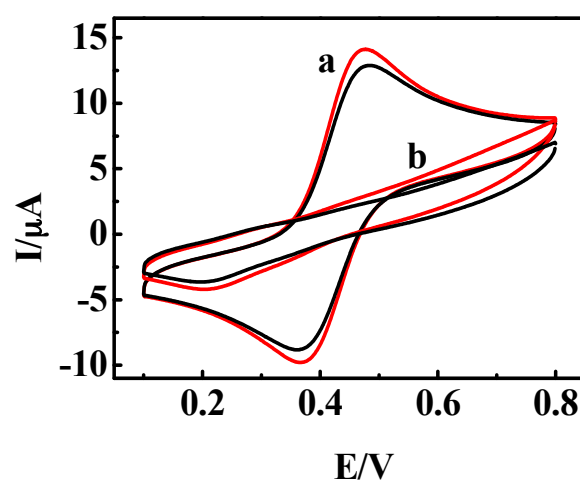

**Figure S5.** CVs of 0.5 mM  $\text{Fc}(\text{COOH})_2$  at  $0.1 \text{ V}\cdot\text{s}^{-1}$  for  $\{\text{Con A/GOD}\}_4/\text{Con A}$  (red) and  $\{\text{Con A/GOD}\}_5$  (black) films in buffers at pH (a) 4.0 and (b) 8.0, respectively.

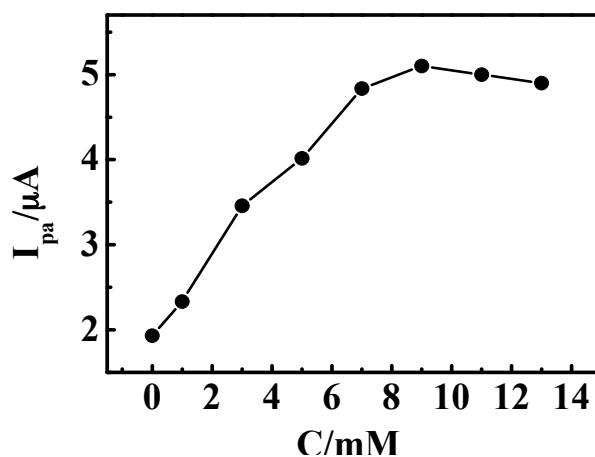

**Figure S6.** Dependence of CV electrocatalytic oxidation peak current ( $I_{pa}$ ) at  $0.005 \text{ V}\cdot\text{s}^{-1}$  on concentration of glucose at {Con A/GOD}<sub>5</sub> film electrodes in pH 4.0 solutions containing 0.5 mM  $\text{Fc}(\text{COOH})_2$  and glucose.

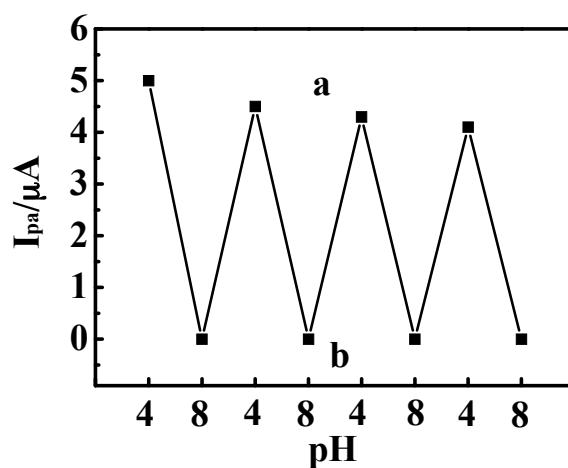

**Figure S7.** Dependence of CV catalytic oxidation peak current ( $I_{pa}$ ) at  $0.005 \text{ V}\cdot\text{s}^{-1}$  on solution pH switched between pH 4.0 and 8.0 for the same {Con A/GOD}<sub>5</sub> films. The solution contained 0.5 mM  $\text{Fc}(\text{COOH})_2$  and 7.0 mM glucose.

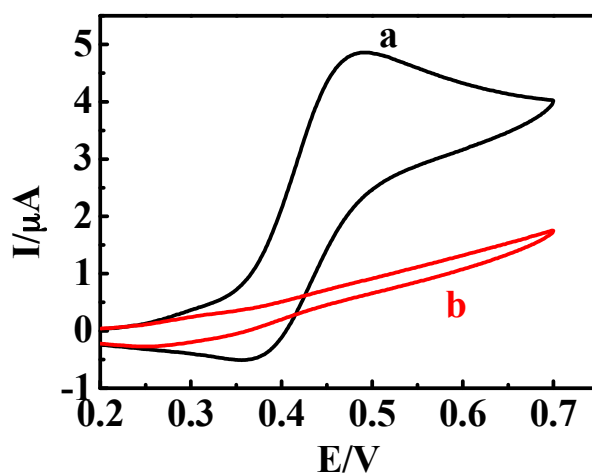

**Figure S8.** CVs of {Con A/GOD}<sub>5</sub> films at  $0.005 \text{ V}\cdot\text{s}^{-1}$  in solutions containing 0.5 mM  $\text{Fc}(\text{COOH})_2$ , 7.0 mM glucose at pH (a) 4.0 and (b) 8.0, which tuned by alternate addition of 10 mM ethyl butyrate and 6 mM urea into unbuffered solutions containing 5 units·mL<sup>-1</sup> esterase and 15 units·mL<sup>-1</sup> urease.
